# Supplementary material for: Evaluating ChatGPT-4’s Role in Diagnosing and Grading Diabetic Retinopathy from Fundus Images
Source: Research Square preprint supplement (doi:10.21203/rs.3.rs-7181467/v1), 2025-09-09

**Supplementary Figure S1: Receiver Operating Characteristic (ROC) Curve for ChatGPT Model Performance in Diabetic Retinopathy (DR) Detection**

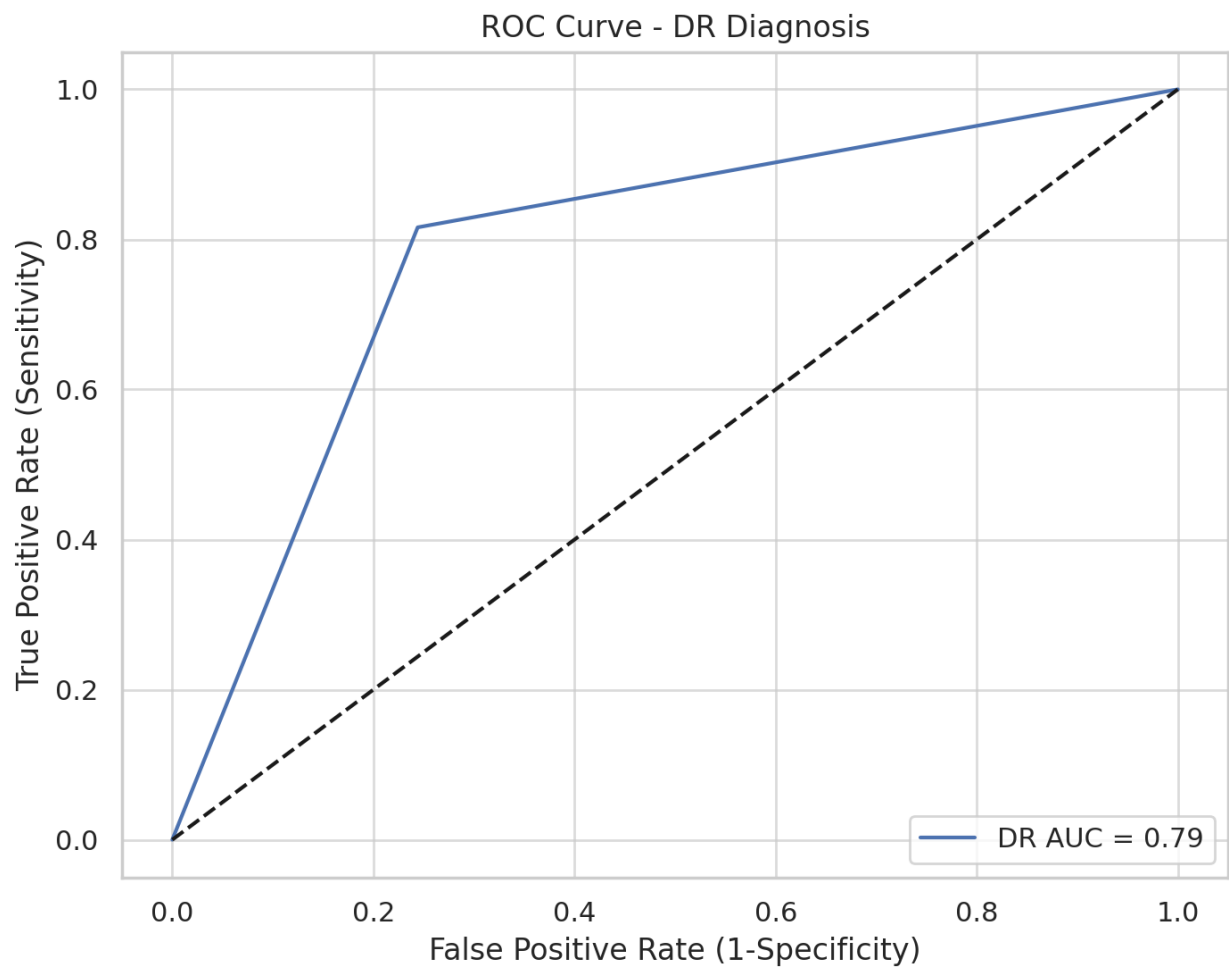

Supplement: Supplementary file 1 [file 61fa7a844714243382b4412f.pdf]
