# Supplementary material for: Evaluating ChatGPT-4’s Role in Diagnosing and Grading Diabetic Retinopathy from Fundus Images
Source: Research Square preprint supplement (doi:10.21203/rs.3.rs-7181467/v1), 2025-09-09

**Supplementary Figure S2: Receiver Operating Characteristic (ROC) Curve for ChatGPT Model Performance in Diabetic Macular Edema (DME) Detection**

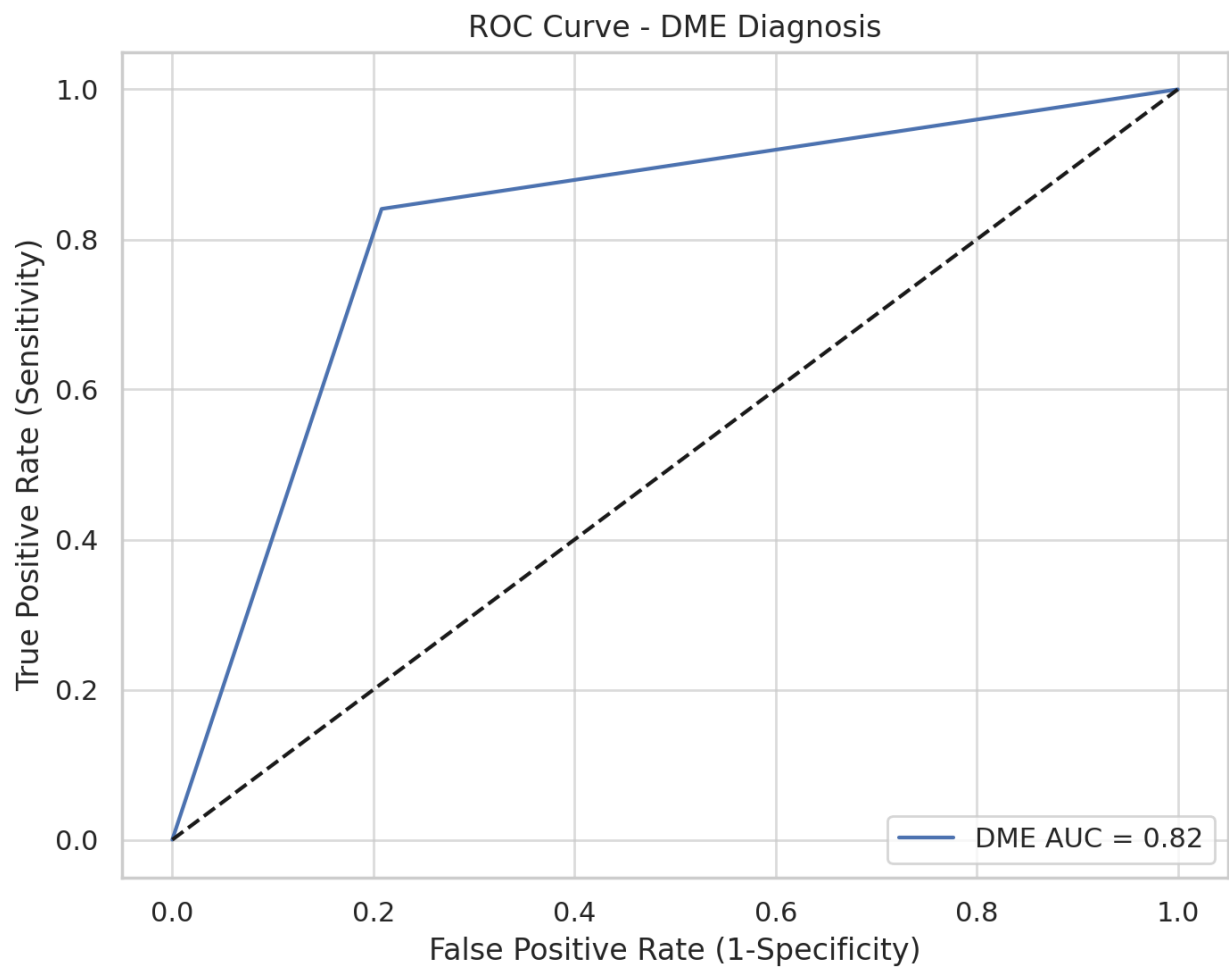

Supplement: Supplementary file 2 [file 7110943c05c6f7de3b01c4fe.pdf]
